# Supplementary material for: Growth patterns for acervuli in human pineal gland
Source: PubMed Central journal article supplement — Sci Rep. 2012 Dec 17;2:984. doi: 10.1038/srep00984 (PMC3523289; doi:10.1038/srep00984), 2012-12-17
Supplement: srep00984-s1.pdf [file srep00984-s1.pdf]

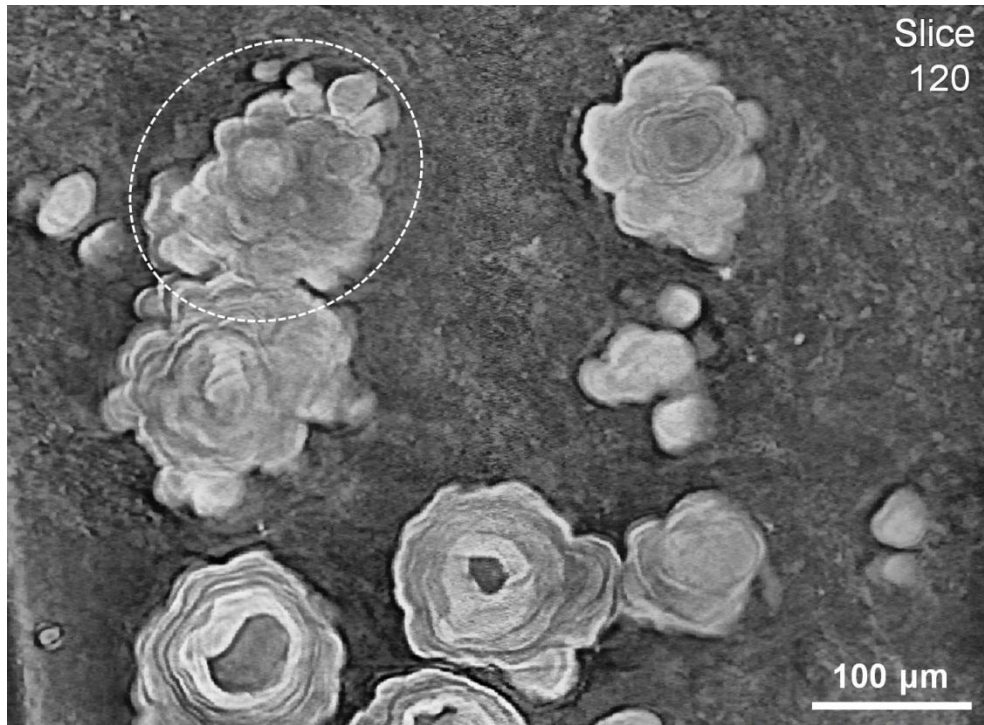

**Supplementary figure 1.** Image of slice 120 in the x-z plane of Fig. 4a. The white dashed circle is corresponding to those in Fig. 4a, b.
